# Supplementary material for: Digestate from Agricultural Biogas Plants as a Reservoir of Antimicrobials and Antibiotic Resistance Genes—Implications for the Environment
Source: MDPI journal article supplement (doi:10.3390/ijerph20032672), 2023-02-02
Supplement: s1 [file s1]

# Digestate from agricultural biogas plants as a reservoir of anti-microbials and antibiotic resistance genes – implications for the environment

Izabela Wolak<sup>1</sup>, Sylwia Bajkacz<sup>2</sup>, Monika Harnisz<sup>1</sup>, Klaudia Stando<sup>2</sup>, Magdalena Męcik<sup>1</sup>, Ewa Korzeniewska<sup>1\*</sup>

<sup>1</sup> Department of Water Protection Engineering and Environmental Microbiology, Faculty of Geoengineering, University of Warmia and Mazury in Olsztyn, Prawocheńskiego 1, 10-720 Olsztyn, Poland

<sup>2</sup> Department of Environmental Biotechnology, Faculty of Energy and Environmental Engineering, Silesian University of Technology, Akademicka 2, 44-100, Gliwice, Poland

\* Correspondence: ewa.korzeniewska@uwm.edu.pl

**Table S1.** Procedures used in the determination of antimicrobials in digestate samples.

| Class of antimicrobials               | Compound | Fraction | References |
|---------------------------------------|----------|----------|------------|
| betalactams                           | AMO      | S        | [1]        |
|                                       |          | L        | [2]        |
|                                       | AMP      | S        | [1]        |
|                                       |          | L        | [2]        |
| tetracyclines                         | TC       | S        | [1]        |
|                                       |          | L        | [2]        |
|                                       | OXY      | S        | [1]        |
|                                       |          | L        | [2]        |
|                                       | DOX      | S        | [1]        |
|                                       |          | L        | [2]        |
| sulphonamides                         | CHLOR    | S        | [1]        |
|                                       |          | L        | [2]        |
|                                       | SMX      | S        | [1]        |
|                                       |          | L        | [2]        |
| fluoroquinolones                      | SFD      | S        | [3]        |
|                                       |          | L        | [2]        |
|                                       | ENF      | S        | [1]        |
|                                       |          | L        | [2]        |
| macrolides                            | CIP      | S        | [1]        |
|                                       |          | L        | [2]        |
| lincosamides                          | CLR      | S        | [3]        |
|                                       |          | L        | [2]        |
| dihydrofolic acid reductase inhibitor | CLD      | S        | [3]        |
|                                       |          | L        | [2]        |
|                                       | TRI      | S        | [3]        |
|                                       |          | L        | [2]        |

AMO – amoxicillin ; AMP – ampicillin; TC – tetracycline; OXY – oxytetracycline; DOX – doxycycline; CHLOR – chlortetracycline; SMX – sulfamethoxazole; SFD – sulphonamide; ENF – enrofloxacin; CIP – ciprofloxacin; CLR – clarithromycin ; CLD – clindamycin; TRI – trimethoprim; S – solid fraction; L – liquid fraction

**Table S2.** Parameters of the qPCR reaction.

| Gene | Primer (5'–3') | Amplicon size (bp) | Annealing temperature (°C) | Reference |
|------|----------------|--------------------|----------------------------|-----------|
|------|----------------|--------------------|----------------------------|-----------|

|                          |                                                  |     |      |     |
|--------------------------|--------------------------------------------------|-----|------|-----|
| <i>cfxA</i>              | CGTAGTTTTGAGTATAGCTTT<br>GATGTTGCCTATATATGTC     | 802 | 56   | [1] |
| <i>bla<sub>TEM</sub></i> | AGTGCTGCCATAACCATGAGTG<br>CTGACTCCCCGTCGTGTAGATA | 431 | 61   | [2] |
| <i>bla<sub>OXa</sub></i> | ATTATCTACAGCAGCGCCAGTG<br>TGCATCCACGTCTTTGGTG    | 296 | 61   |     |
| <i>tetA</i>              | GCTACATCCTGCTTGCCTTC<br>GCATAGATCGCCGTGAAGAG     | 211 | 54   | [3] |
| <i>tetM</i>              | ACAGAAAGCTTATTATATAAC<br>TGGCGTGTCTATGATGTTTAC   | 171 | 55   |     |
| <i>aac 6'-<br/>Ib-cr</i> | TTGCAGTGCTCTATGAGTGGCTA<br>CTCGAATGCCTGGCGTGTTT  | 482 | 57   | [4] |
| <i>qepA</i>              | GCCGGTGATGCTGCTGA<br>CAGTAACAGCGCACCAA           | 204 | 63   | [5] |
| <i>sul1</i>              | CGCACCGGAAACATCGCTGCAC<br>TGAAGTTCCGCCGCAAGGCTCG | 163 | 55.9 | [4] |
| <i>sul2</i>              | TCCGGTGGAGGCCGGTATCTGG<br>CGGGAATGCCATCTGCCTTGAG | 191 | 57.5 |     |
| <i>intI1</i>             | CCTCCCGCACGATGATC<br>TCCACGCATCGTCAGGC           | 280 | 54   | [5] |
| <i>intI2</i>             | TTATTGCTGGGATTAGGC<br>ACGGCTACCCTCTGTTATC        | 233 | 50   |     |
| <i>ermF</i>              | TAGATATTGGGGCAGGCAAG<br>GGAAATTGCGGAAGTCAAA      | 126 | 58   | [6] |

**Table S3.** Antibiotic concentrations in digestate samples.

| Samples of digestate from biogas plants |          |            |        |       |       |        |      |      |
|-----------------------------------------|----------|------------|--------|-------|-------|--------|------|------|
| Antibiotic                              | Fraction | Parameters | BP1W   | BP1S  | BP2W  | BP2S   | BP3W | BP3S |
| SFD                                     | LF       | Av.        | 136.5  | 98.2  | 106.8 | n.d    | n.d  | n.d  |
|                                         |          | SD.        | 21.6   | 14.3  | 8.8   | -      | -    | -    |
|                                         | SF       | Av.        | n.d    | n.d   | n.d   | n.d    | n.d  | n.d  |
|                                         |          | SD         | -      | -     | -     | -      | -    | -    |
| TC                                      | LF       | Av.        | 368.7  | 275.6 | n.d   | n.d    | n.d  | n.d  |
|                                         |          | SD         | 27.2   | 32.3  | -     | -      | -    | -    |
|                                         | SF       | Av.        | 1164.4 | 464.8 | n.d   | n.d    | n.d  | n.d  |
|                                         |          | SD         | 216.3  | 104.8 | -     | -      | -    | -    |
| DOX                                     | LF       | Av.        | <LOQ   | 620.4 | 854.6 | 1555.9 | n.d  | n.d  |
|                                         |          | SD         | -      | 34.2  | 142.7 | 305.9  | -    | -    |
|                                         | SF       | Av.        | 218.1  | 800.2 | 396.7 | 1282.5 | n.d  | n.d  |
|                                         |          | SD         | 26.4   | 131.1 | 69.5  | 193.8  | -    | -    |
| CIP                                     | LF       | Av.        | n.d    | n.d   | n.d   | n.d    | n.d  | n.d  |
|                                         |          | SD         | -      | -     | -     | -      | -    | -    |
|                                         | SF       | Av.        | 145.3  | 92.4  | n.d   | n.d    | n.d  | n.d  |
|                                         |          | SD         | 21.1   | 13.4  | -     | -      | -    | -    |
| ENF                                     | LF       | Av.        | n.d    | n.d   | n.d   | n.d    | n.d  | n.d  |
|                                         |          | SD         | -      | -     | -     | -      | -    | -    |
|                                         | SF       | Av.        | 147.1  | 387.9 | n.d   | n.d    | n.d  | n.d  |
|                                         |          | SD         | 21.8   | 56.2  | -     | -      | -    | -    |
| CLR                                     | LF       | Av.        | 208.9  | 56.97 | n.d   | n.d    | n.d  | n.d  |
|                                         |          | SD         | 27.2   | 8.3   | -     | -      | -    | -    |

|     |    |     |       |       |      |       |     |     |
|-----|----|-----|-------|-------|------|-------|-----|-----|
| CLD | SF | Av. | 62.8  | 70.7  | n.d  | n.d   | n.d | n.d |
|     |    | SD  | 9.8   | 9.4   | -    | -     | -   | -   |
|     | LF | Av. | 268.4 | 88.6  | n.d  | n.d   | n.d | n.d |
|     |    | SD  | 29.1  | 8.7   | -    | -     | -   | -   |
|     | SF | Av. | n.d   | n.d   | n.d  | n.d   | n.d | n.d |
|     |    | SD  | -     | -     | -    | -     | -   | -   |
| TRI | LF | Av. | n.d   | n.d   | n.d  | n.d   | n.d | n.d |
|     |    | SD  | -     | -     | -    | -     | -   | -   |
|     | SF | Av. | 66.8  | 226.1 | <LOQ | 261.9 | n.d | n.d |
|     |    | SD  | 7.6   | 42.5  | -    | 53.2  | -   | -   |

BP – biogas plant; 1,2,3 – Number of BP; W – winter; S – spring; SFD - sulfadiazine; TC - tetracycline; DOX - doxycycline; CIP - ciprofloxacin; ENF - enrofloxacin; CLR - clarithromycin; CLD - clindamycin; TRI - trimethoprim; Av. – Average (ng/g in solid fraction or ng/L In liquid fraction); SD – standard deviation; n.d – not detected;

**Table S4.** The presence and absolute abundance of antibiotic resistance genes (ARGs) in digestate samples (abbreviations are explained in Table S3) (number of copies/g of digestate).

| Targeted genes and class of antibiotics |             |                          |                          |               |             |                     |             |              |             |             |                 |              |
|-----------------------------------------|-------------|--------------------------|--------------------------|---------------|-------------|---------------------|-------------|--------------|-------------|-------------|-----------------|--------------|
| Sample                                  | betalactams |                          |                          | tetracyclines |             | fluoroquinolones    |             | sulfonamides |             | MLS group   | Integrase genes |              |
|                                         | <i>cfxA</i> | <i>bla<sub>TEM</sub></i> | <i>bla<sub>OXA</sub></i> | <i>tetA</i>   | <i>tetM</i> | <i>aac 6'-Ib-cr</i> | <i>qepA</i> | <i>sul1</i>  | <i>sul2</i> | <i>ermF</i> | <i>intI1</i>    | <i>intI2</i> |
| BP1S                                    | 4.98E3      | 1.07E4                   | 2.60E3                   | 2.47E5        | 1.26E6      | 9.50E3              | 2.34E5      | 5.19E10      | 1.63E5      | 4.13E7      | 4.37E5          | 4.37E5       |
| BP1W                                    | 3.33E5      | 7.78E4                   | 3.05E3                   | 2.22E6        | 2.25E6      | 5.02E3              | 5.10E4      | 8.89E10      | 7.2E5       | 7.08E7      | 7.24E6          | 8.14E6       |
| BP2S                                    | 4.98E3      | 3.11E4                   | 4.25E4                   | 7.87E4        | 9.65E5      | 2.60E3              | 1.60E4      | 2.11E10      | 3.14E6      | 1.00E8      | 6.94E6          | 5.84E7       |
| BP2W                                    | 2.79E3      | 3.21E4                   | 1.16E3                   | 1.28E4        | 2.89E5      | 4.25E4              | 1.60E4      | 2.9E9        | 1.42E5      | 1.06E7      | 8.76E6          | 9.39E6       |
| BP3S                                    | 1.50E3      | 3.46E3                   | 3.70E3                   | 1.10E4        | 2.29E5      | 3.70E3              | 6.15E4      | 2.98E9       | 1.19E5      | 2.30E7      | 5.19E5          | 1.39E5       |
| BP3W                                    | 5.73E2      | 2.83E3                   | 1.67E3                   | 1.21E4        | 1.64E5      | 3.05E3              | 3.31E5      | 2.45E9       | 6.25E4      | 2.47E7      | 2.78E5          | 1.11E5       |

S – spring; W – winter

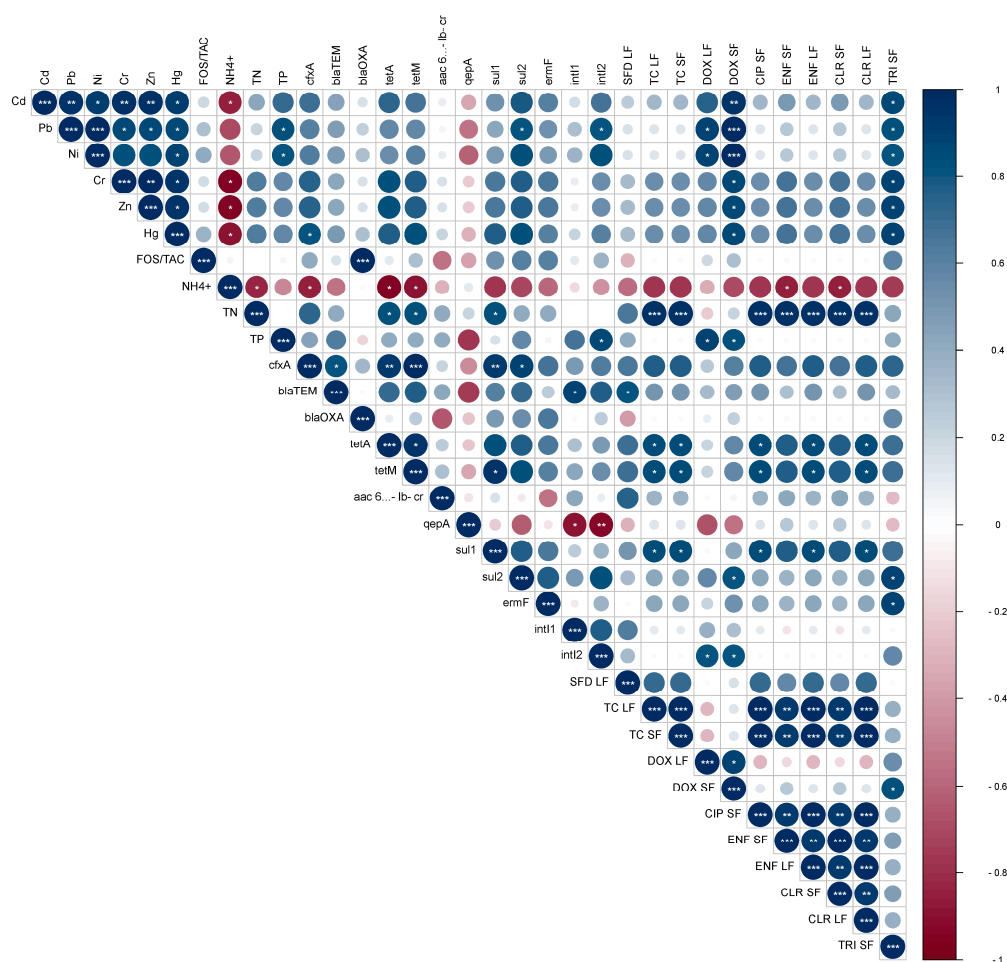

**Figure S1.** Spearman's non-parametric correlation analysis between antibiotic concentrations and concentrations of ARGs, integrase genes, physicochemical parameters (TN – total nitrogen; TP – total phosphorus), and concentration of HMs (Cd - cadmium, Pb – lead, Ni – nickel, Cr – chromium, Zn – zinc, and Hg – mercury) (other abbreviations are explained in Table S1 and Table S3). Significant statistical results are marked with an asterisk: \* for  $p < 0.05$ ; \*\* for  $p < 0.01$ ; \*\*\*  $p < 0.001$ .

## References

1. Bajkacz, S.; Felis, E.; Kycia-Słocka, E.; Harnisz, M.; Korzeniewska, E. Development of a new SLE-SPE-HPLC-MS/MS method for the determination of selected antibiotics and their transformation products in anthropogenically altered solid environmental matrices. *Sci. Total Environ.* 2020, 726, doi:10.1016/j.scitotenv.2020.138071.
2. Kokoszka, K.; Zieliński, W.; Korzeniewska, E.; Felis, E.; Harnisz, M.; Bajkacz, S. Suspect screening of antimicrobial agents transformation products in environmental samples development of LC-QTrap method running in pseudo MRM transitions. *Sci. Total Environ.* 2022, 808, doi:10.1016/j.scitotenv.2021.152114.
3. Buta, M.; Korzeniewska, E.; Harnisz, M.; Hubeny, J.; Zieliński, W.; Rolbiecki, D.; Bajkacz, S.; Felis, E.; Kokoszka, K. Microbial and chemical pollutants on the manure-crops pathway in the perspective of "One Health" holistic approach. *Sci. Total Environ.* 2021, 785, doi:10.1016/j.scitotenv.2021.147411.
4. Pei, R.; Kim, S.C.; Carlson, K.H.; Pruden, A. Effect of River Landscape on the sediment concentrations of antibiotics and corresponding antibiotic resistance genes (ARG). *Water Res.* 2006, 40, 2427–2435, doi:10.1016/j.watres.2006.04.017.
5. Goldstein, C.; Lee, M.D.; Sanchez, S.; Hudson, C.; Phillips, B.; Register, B.; Grady, M.; Liebert, C.; Summers, A.O.; White, D.G.; et al. Incidence of class 1 and 2 integrase in clinical and commensal bacteria from livestock, companion animals, and exotics. *Antimicrob. Agents Chemother.* 2001, 45, 723–726, doi:10.1128/AAC.45.3.723-726.2001.
6. Eitel, Z.; Sóki, J.; Urbán, E.; Nagy, E. The prevalence of antibiotic resistance genes in *Bacteroides fragilis* group strains isolated in different European countries. *Anaerobe* 2013, 21, 43–49, doi:10.1016/j.anaerobe.2013.03.001.
